# Supplementary material
Source: Springer Nature journal article supplement (https://www.springermedizin.de/resource/supplementary/12889_2011_4123_MOESM1_ESM.pdf/9491106)

Step 1

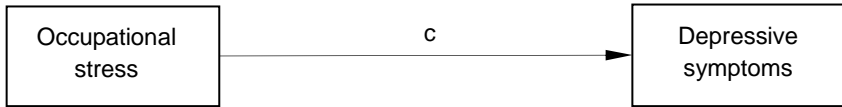

Step 2

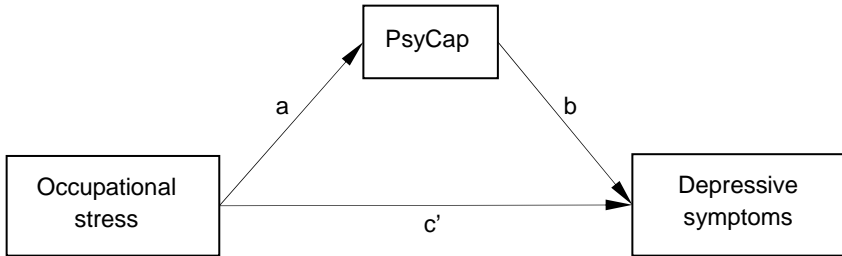

Supplement: MOESM1 [file 9491106]
